# Supplementary material for: Reduced microRNA-744 expression in mast cell-derived exosomes triggers epithelial cell ferroptosis in acute respiratory distress syndrome
Source: PubMed Central journal article supplement (PMC11493202; doi:10.1016/j.redox.2024.103387), 2024-10-03
Supplement: mmc2.pdf [file mmc2.pdf]

**Figure 1 DE**

| <b>IL6</b>                    |        |        |                     |                     |                          |                          |
|-------------------------------|--------|--------|---------------------|---------------------|--------------------------|--------------------------|
| PBS                           | PBS-CM | LPS-CM | PBS-EX <sub>s</sub> | LPS-EX <sub>s</sub> | PBS-EX <sub>s</sub> -LPS | LPS-EX <sub>s</sub> -LPS |
| 1.078                         | 1.266  | 3.766  | 1.536               | 5.141               | 2.277                    | 12.951                   |
| 0.928                         | 1.451  | 3      | 1.527               | 7.428               | 2.31                     | 12.614                   |
| 0.864                         | 1.441  | 3.029  | 1.529               | 4.278               | 2.505                    | 9.667                    |
| 0.657                         | 0.662  | 3.256  | 1.442               | 5.614               | 2.408                    | 7.765                    |
| 1.522                         | 1.908  | 3.141  | 1.385               | 5.756               | 2.789                    | 7.89                     |
| 1.088                         | 1.626  | 3.061  | 1.247               | 4.959               | 2.491                    | 7.568                    |
| <b>TNF<math>\alpha</math></b> |        |        |                     |                     |                          |                          |
| PBS                           | PBS-CM | LPS-CM | PBS-EX <sub>s</sub> | LPS-EX <sub>s</sub> | PBS-EX <sub>s</sub> -LPS | LPS-EX <sub>s</sub> -LPS |
| 0.988                         | 2.184  | 6.431  | 2.825               | 7.873               | 3.078                    | 18.088                   |
| 1.013                         | 2.395  | 4.908  | 2.645               | 7.506               | 3.061                    | 13.881                   |
| 1.223                         | 2.789  | 4.281  | 2.854               | 4.513               | 3.173                    | 11.204                   |
| 0.81                          | 1.497  | 2.339  | 1.105               | 2.928               | 2.344                    | 4.931                    |
| 1.235                         | 1.55   | 2.266  | 1.127               | 3.371               | 2.193                    | 4.853                    |
| 0.864                         | 1.461  | 2.083  | 0.889               | 3.331               | 1.989                    | 4.777                    |
| <b>GPX4</b>                   |        |        |                     |                     |                          |                          |
| PBS                           | PBS-CM | LPS-CM | PBS-EX <sub>s</sub> | LPS-EX <sub>s</sub> | PBS-EX <sub>s</sub> -LPS | LPS-EX <sub>s</sub> -LPS |
| 1.03                          | 0.844  | 0.607  | 0.894               | 0.508               | 0.664                    | 0.381                    |
| 1.033                         | 0.827  | 0.613  | 0.9                 | 0.53                | 0.682                    | 0.436                    |
| 1.002                         | 0.799  | 0.59   | 0.817               | 0.531               | 0.676                    | 0.457                    |
| 0.968                         | 0.792  | 0.595  | 0.823               | 0.558               | 0.678                    | 0.48                     |
| 0.978                         | 0.804  | 0.594  | 0.821               | 0.558               | 0.683                    | 0.479                    |
| 0.991                         | 0.904  | 0.61   | 0.864               | 0.583               | 0.682                    | 0.408                    |
| <b>ACSL4</b>                  |        |        |                     |                     |                          |                          |
| PBS                           | PBS-CM | LPS-CM | PBS-EX <sub>s</sub> | LPS-EX <sub>s</sub> | PBS-EX <sub>s</sub> -LPS | LPS-EX <sub>s</sub> -LPS |
| 0.998                         | 1.126  | 2.164  | 1.126               | 1.927               | 2.012                    | 3.172                    |
| 1.002                         | 1.253  | 2.118  | 1.185               | 1.973               | 1.816                    | 3.302                    |
| 1.078                         | 1.246  | 2.134  | 1.3                 | 2.063               | 1.937                    | 3.372                    |
| 1.037                         | 0.852  | 2.868  | 1.015               | 2.058               | 1.705                    | 4.26                     |
| 0.965                         | 0.795  | 2.449  | 1.053               | 2.034               | 1.487                    | 4.359                    |
| 0.884                         | 0.791  | 2.123  | 1.015               | 2.278               | 1.327                    | 4.067                    |
| <b>ALOX15</b>                 |        |        |                     |                     |                          |                          |
| PBS                           | PBS-CM | LPS-CM | PBS-EX <sub>s</sub> | LPS-EX <sub>s</sub> | PBS-EX <sub>s</sub> -LPS | LPS-EX <sub>s</sub> -LPS |
| 0.997                         | 0.899  | 1.48   | 1.02                | 1.941               | 1.852                    | 3.089                    |
| 1.003                         | 1.296  | 1.843  | 1.218               | 1.952               | 1.695                    | 3.359                    |
| 1.225                         | 1.45   | 1.901  | 1.699               | 2.098               | 2.123                    | 3.411                    |
| 0.976                         | 0.581  | 1.937  | 0.679               | 1.691               | 1.452                    | 4.266                    |
| 1.025                         | 0.531  | 2.003  | 0.855               | 1.731               | 1.267                    | 4.219                    |
| 0.907                         | 0.653  | 1.875  | 0.643               | 1.546               | 1.073                    | 3.742                    |



| <b>Figure 3B</b>  |                         |
|-------------------|-------------------------|
| miR-NC_PBS-MC-EXs | anta-miR-744_PBS-MC-EXs |
| 0.942             | 0.271                   |
| 1.061             | 0.307                   |
| 1.11              | 0.306                   |
| 1.15              | 0.318                   |
| 1.426             | 0.335                   |
| 1.433             | 0.347                   |

| <b>Figure 3C</b> |                   |                         |
|------------------|-------------------|-------------------------|
| PBS              | miR-NC_PBS-MC-EXs | anta-miR-744_PBS-MC-EXs |
| 0.92             | 1.561             | 0.492                   |
| 1.087            | 2.618             | 0.628                   |
| 1.013            | 2.546             | 0.608                   |
| 1.059            | 2.58              | 0.639                   |
| 1.041            | 2.518             | 0.639                   |
| 1.036            | 2.568             | 0.801                   |
| <b>Figure 3D</b> |                   |                         |
| GPX4             |                   |                         |
| PBS              | miR-NC_PBS-MC-EXs | anta-miR-744_PBS-MC-EXs |
| 0.953            | 0.647             | 0.288                   |
| 1.05             | 0.647             | 0.342                   |
| 1.082            | 0.847             | 0.37                    |
| 1.103            | 0.949             | 0.356                   |
| 1.069            | 0.991             | 0.352                   |
| 1.135            | 0.994             | 0.398                   |
| ACSL4            |                   |                         |
| PBS              | miR-NC_PBS-MC-EXs | anta-miR-744_PBS-MC-EXs |
| 0.989            | 0.953             | 1.994                   |
| 1.011            | 1.018             | 1.904                   |
| 0.989            | 1                 | 1.793                   |
| 0.995            | 0.967             | 1.83                    |
| 1.08             | 1.019             | 1.769                   |
| 0.988            | 1.04              | 1.909                   |
| ALOX15           |                   |                         |
| PBS              | miR-NC_PBS-MC-EXs | anta-miR-744_PBS-MC-EXs |
| 1.03             | 0.893             | 5.028                   |
| 0.971            | 0.99              | 5.359                   |
| 0.971            | 1.061             | 4.911                   |
| 1.091            | 1.061             | 4.8                     |
| 1.259            | 1.107             | 5.238                   |
| 1.275            | 1.097             | 5.426                   |
| IL6              |                   |                         |
| PBS              | miR-NC_PBS-MC-EXs | anta-miR-744_PBS-MC-EXs |
| 1.012            | 1.491             | 4.391                   |
| 0.989            | 1.607             | 4.446                   |
| 1.133            | 1.467             | 4.189                   |
| 1.949            | 1.718             | 4.137                   |
| 2.06             | 2.429             | 4.511                   |
| 2.522            | 3.02              | 6.044                   |
| TNFa             |                   |                         |
| PBS              | miR-NC_PBS-MC-EXs | anta-miR-744_PBS-MC-EXs |
| 0.804            | 0.9               | 2.202                   |
| 1.244            | 0.98              | 2.116                   |
| 1.578            | 1.454             | 2.282                   |
| 1.796            | 1.562             | 2.621                   |
| 1.724            | 1.534             | 2.789                   |
| 1.701            | 1.88              | 3.027                   |

| <b>Figure 4B</b>  |                    |
|-------------------|--------------------|
| miR-NC_LPS-MC-EXs | miR-744_LPS-MC-EXs |
| 0.98              | 39.138             |
| 1.021             | 38.868             |
| 0.997             | 40.155             |
| 1.033             | 39.988             |
| 1.009             | 40.238             |
| 1.003             | 40.21              |

| <b>Figure 4C</b> |                   |                    |
|------------------|-------------------|--------------------|
| PBS              | miR-NC_LPS-MC-EXs | miR-744_LPS-MC-EXs |
| 1.019            | 0.491             | 30.696             |
| 0.981            | 0.496             | 23.736             |
| 1                | 0.457             | 27.077             |
| 0.876            | 0.435             | 29.487             |
| 0.642            | 0.399             | 28.601             |
| 0.57             | 0.4               | 30.127             |

| <b>Figure 4D</b> |                   |                    |
|------------------|-------------------|--------------------|
| GPX4             |                   |                    |
| PBS              | miR-NC_LPS-MC-EXs | miR-744_LPS-MC-EXs |
| 0.914            | 0.343             | 0.998              |
| 1.094            | 0.346             | 0.974              |
| 1.094            | 0.337             | 0.972              |
| 1.13             | 0.345             | 1.006              |
| 1.123            | 0.329             | 0.993              |
| 0.846            | 0.321             | 0.932              |

| ACSL4 |                   |                    |
|-------|-------------------|--------------------|
| PBS   | miR-NC_LPS-MC-EXs | miR-744_LPS-MC-EXs |
| 1.095 | 1.953             | 0.698              |
| 0.914 | 1.049             | 0.881              |
| 1.168 | 1.51              | 0.888              |
| 0.831 | 2.394             | 0.96               |
| 0.937 | 1.738             | 0.931              |
| 1.063 | 2.695             | 1.626              |

| ALOX15 |                   |                    |
|--------|-------------------|--------------------|
| PBS    | miR-NC_LPS-MC-EXs | miR-744_LPS-MC-EXs |
| 1.415  | 5.786             | 0.547              |
| 0.707  | 2.679             | 0.52               |
| 1.153  | 4.168             | 0.638              |
| 0.777  | 5.295             | 0.583              |
| 0.821  | 4.012             | 0.596              |
| 0.613  | 5.15              | 0.796              |

| IL6   |                   |                    |
|-------|-------------------|--------------------|
| PBS   | miR-NC_LPS-MC-EXs | miR-744_LPS-MC-EXs |
| 1.295 | 8.34              | 0.384              |
| 0.772 | 4.604             | 0.543              |
| 1.26  | 6.329             | 0.557              |
| 0.76  | 8.55              | 0.593              |
| 0.845 | 7.091             | 0.543              |
| 0.875 | 10.454            | 0.901              |

| TNFa  |                   |                    |
|-------|-------------------|--------------------|
| PBS   | miR-NC_LPS-MC-EXs | miR-744_LPS-MC-EXs |
| 1.135 | 13.9              | 1.677              |
| 0.881 | 6.635             | 2.817              |
| 1.64  | 12.987            | 0.893              |
| 0.941 | 13.05             | 2.56               |
| 1.129 | 11.503            | 3.171              |
| 0.752 | 12.579            | 3.683              |

**Figure 5C,D**

| GPX4   |                   |                    |
|--------|-------------------|--------------------|
| PBS    | miR-NC+LPS-MC-EXs | miR-744+LPS-MC-EXs |
| 0.879  | 0.297             | 0.602              |
| 1.138  | 0.271             | 0.583              |
| 1.454  | 0.27              | 0.593              |
| 1.474  | 0.272             | 0.568              |
| 1.448  | 0.274             | 0.576              |
| 1.274  | 0.288             | 0.706              |
| ACSL4  |                   |                    |
| PBS    | miR-NC+LPS-MC-EXs | miR-744+LPS-MC-EXs |
| 1.033  | 4.117             | 1.987              |
| 0.968  | 4.283             | 1.901              |
| 0.972  | 4.443             | 1.965              |
| 0.999  | 4.361             | 2.119              |
| 1.026  | 4.382             | 2.054              |
| 0.943  | 4.3               | 2.066              |
| ALOX15 |                   |                    |
| PBS    | miR-NC+LPS-MC-EXs | miR-744+LPS-MC-EXs |
| 0.997  | 5.2               | 2.306              |
| 1.003  | 6.711             | 2.482              |
| 1.002  | 6.536             | 2.622              |
| 1.028  | 6.614             | 2.618              |
| 1.016  | 6.948             | 2.712              |
| 1.201  | 7.323             | 2.71               |
| IL6    |                   |                    |
| PBS    | miR-NC+LPS-MC-EXs | miR-744+LPS-MC-EXs |
| 0.982  | 4.033             | 1.791              |
| 1.018  | 3.907             | 1.968              |
| 1.022  | 3.856             | 1.975              |
| 1.038  | 3.811             | 2.022              |
| 1.001  | 3.732             | 1.962              |
| 0.92   | 3.782             | 1.994              |
| TNFa   |                   |                    |
| PBS    | miR-NC+LPS-MC-EXs | miR-744+LPS-MC-EXs |
| 0.854  | 4.838             | 1.751              |
| 1.171  | 4.719             | 2.356              |
| 1.218  | 4.693             | 2.499              |
| 1.24   | 5.361             | 2.724              |
| 1.203  | 5.73              | 2.622              |
| 1.054  | 6.895             | 3.032              |

| miRNA Transfection Figure 6 A |            |             |              |             |
|-------------------------------|------------|-------------|--------------|-------------|
|                               | PBS        | miR-NC      | anta-miR-744 | miR-744     |
|                               | 1.08584344 | 0.891214621 | 0.644927843  | 25.90591545 |
|                               | 0.84618505 | 0.94759193  | 0.679812908  | 25.58470441 |
|                               | 0.9842083  | 0.992682249 | 0.684541381  | 29.00459683 |
|                               | 0.95172643 | 1.021959354 | 0.701837851  | 29.16587922 |
|                               | 1.05221964 | 0.98863503  | 0.69844076   | 29.32805844 |
|                               | 1.10423595 | 0.99387493  | 0.715592246  | 29.75808246 |

| figure 6D |         |              |                        |                       |                |                 |
|-----------|---------|--------------|------------------------|-----------------------|----------------|-----------------|
| PBS       | miR-NC  | anta-miR-744 | ALOX15_IN-anta-miR-744 | ACSL4_IN-anta-miR-744 | GPX4_IN-miR-NC | GPX4_IN-miR-744 |
| 139.723   | 148.838 | 85.315       | 113.834                | 107.629               | 66.308         | 122.373         |
| 138.373   | 145.225 | 57.533       | 111.611                | 101.529               | 59.02          | 124.313         |
| 143.016   | 132.53  | 64.232       | 117.735                | 123.426               | 63.861         | 126.158         |

| figure 6F. Flow cytometry for ROS |        |              |
|-----------------------------------|--------|--------------|
| PBS                               | miR-NC | anta-miR-744 |
| 40                                | 33.1   | 52.2         |
| 40.9                              | 46.2   | 54.6         |
| 44.4                              | 42.6   | 54.8         |

| figure 6E |        |              |                        |                       |                |                 |
|-----------|--------|--------------|------------------------|-----------------------|----------------|-----------------|
| PBS       | miR-NC | anta-miR-744 | ALOX15_IN-anta-miR-744 | ACSL4_IN-anta-miR-744 | GPX4_IN-miR-NC | GPX4_IN-miR-744 |
| 764       | 804    | 1833         | 1349                   | 1077                  | 2224           | 1499            |
| 778       | 768    | 1799         | 1285                   | 977                   | 2273           | 1581            |
| 830       | 817    | 1832         | 1268                   | 1043                  | 2302           | 1471            |
| 867       | 848    | 1785         | 1295                   | 1042                  | 2293           | 1533            |
| 852       | 812    | 1843         | 1247                   | 1009                  | 2297           | 1488            |
| 835       | 808    | 1806         | 1297                   | 1015                  | 2278           | 1491            |

| Figure 6H<br>GPX4 |          |              |                        |                       |                |                 |
|-------------------|----------|--------------|------------------------|-----------------------|----------------|-----------------|
| PBS               | miR-NC   | anta-miR-744 | ALOX15_IN-anta-miR-744 | ACSL4_IN-anta-miR-744 | GPX4_IN-miR-NC | GPX4_IN-miR-744 |
| 0.94279           | 1.004864 | 0.322417     | 0.778085               | 0.571173              | 0.382359       | 0.65022         |
| 1.02243           | 0.943438 | 0.354781     | 0.77164                | 0.580352              | 0.366783       | 0.644387        |
| 1.03742           | 0.953299 | 0.336342     | 0.779165               | 0.591316              | 0.35233        | 0.678302        |
| 0.97288           | 0.937788 | 0.184838     | 0.588182               | 0.830086              | 0.364334       | 0.609768        |
| 1.03192           | 0.937788 | 0.199759     | 0.537871               | 0.76755               | 0.356095       | 0.598878        |
| 0.99608           | 0.886587 | 0.191888     | 0.506044               | 0.814131              | 0.337354       | 0.611885        |

| ACSL4   |          |              |                        |                       |                |                 |
|---------|----------|--------------|------------------------|-----------------------|----------------|-----------------|
| PBS     | miR-NC   | anta-miR-744 | ALOX15_IN-anta-miR-744 | ACSL4_IN-anta-miR-744 | GPX4_IN-miR-NC | GPX4_IN-miR-744 |
| 0.96571 | 1.044394 | 2.377865     | 1.97201                | 1.41095               | 2.915345       | 1.886440591     |
| 0.98328 | 0.984639 | 2.50475      | 1.762553               | 1.443596              | 2.516933       | 1.610676394     |
| 1.05312 | 0.983275 | 2.582318     | 1.700155               | 1.444597              | 2.550299       | 1.837401188     |
| 1.08448 | 0.87904  | 2.577549     | 1.689973               | 1.118062              | 2.602684       | 1.984808749     |
| 0.91067 | 0.843816 | 2.579337     | 1.669019               | 1.354725              | 2.321408       | 1.831467373     |
| 1.01256 | 0.852635 | 2.503593     | 1.540074               | 1.270151              | 2.353813       | 1.888184838     |

| ALOX15  |          |              |                        |                       |                |                 |
|---------|----------|--------------|------------------------|-----------------------|----------------|-----------------|
| PBS     | miR-NC   | anta-miR-744 | ALOX15_IN-anta-miR-744 | ACSL4_IN-anta-miR-744 | GPX4_IN-miR-NC | GPX4_IN-miR-744 |
| 0.90063 | 1.178539 | 5.61778      | 1.404445               | 2.005553              | 4.76673        | 1.823866331     |
| 0.87782 | 1.185093 | 4.594793     | 1.497961               | 1.36604               | 4.563055       | 1.851892045     |
| 1.26488 | 0.963262 | 3.994459     | 1.482467               | 1.278099              | 3.877159       | 1.863480859     |
| 0.85145 | 0.641713 | 3.893317     | 1.251796               | 1.151089              | 3.267076       | 1.825130977     |
| 0.84851 | 0.617709 | 3.89062      | 1.274561               | 1.128182              | 2.838247       | 1.609932275     |
| 1.38415 | 0.635516 | 3.703784     | 1.387031               | 1.104199              | 2.775985       | 1.606587994     |

| Figure7 A |        |              |                        |                       |                |                 |
|-----------|--------|--------------|------------------------|-----------------------|----------------|-----------------|
| 0h        |        |              |                        |                       |                |                 |
| PBS       | miR-NC | anta-miR-744 | ALOX15_IN-anta-miR-744 | ACSL4_IN-anta-miR-744 | GPX4_IN-miR-NC | GPX4_IN-miR-744 |
| 0.418     | 0.425  | 0.415        | 0.423                  | 0.417                 | 0.426          | 0.425           |
| 0.422     | 0.412  | 0.417        | 0.421                  | 0.416                 | 0.422          | 0.418           |
| 0.423     | 0.416  | 0.423        | 0.417                  | 0.424                 | 0.414          | 0.423           |
| 0.426     | 0.425  | 0.422        | 0.419                  | 0.423                 | 0.415          | 0.426           |
| 0.412     | 0.427  | 0.416        | 0.424                  | 0.413                 | 0.422          | 0.412           |
| 0.417     | 0.415  | 0.425        | 0.414                  | 0.427                 | 0.414          | 0.423           |
| 24h       |        |              |                        |                       |                |                 |
| PBS       | miR-NC | anta-miR-744 | ALOX15_IN-anta-miR-744 | ACSL4_IN-anta-miR-744 | GPX4_IN-miR-NC | GPX4_IN-miR-744 |
| 0.435     | 0.443  | 0.421        | 0.428                  | 0.424                 | 0.422          | 0.429           |
| 0.446     | 0.435  | 0.426        | 0.432                  | 0.422                 | 0.426          | 0.431           |
| 0.442     | 0.438  | 0.418        | 0.425                  | 0.432                 | 0.417          | 0.427           |
| 0.445     | 0.448  | 0.423        | 0.427                  | 0.427                 | 0.423          | 0.435           |
| 0.431     | 0.447  | 0.415        | 0.435                  | 0.418                 | 0.428          | 0.426           |
| 0.437     | 0.434  | 0.427        | 0.423                  | 0.433                 | 0.421          | 0.434           |
| 48h       |        |              |                        |                       |                |                 |
| PBS       | miR-NC | anta-miR-744 | ALOX15_IN-anta-miR-744 | ACSL4_IN-anta-miR-744 | GPX4_IN-miR-NC | GPX4_IN-miR-744 |
| 0.517     | 0.523  | 0.446        | 0.472                  | 0.462                 | 0.441          | 0.465           |
| 0.526     | 0.518  | 0.443        | 0.468                  | 0.465                 | 0.438          | 0.467           |
| 0.515     | 0.522  | 0.452        | 0.466                  | 0.476                 | 0.445          | 0.462           |
| 0.521     | 0.516  | 0.453        | 0.475                  | 0.471                 | 0.442          | 0.451           |
| 0.516     | 0.524  | 0.447        | 0.465                  | 0.467                 | 0.432          | 0.453           |
| 0.514     | 0.513  | 0.441        | 0.467                  | 0.473                 | 0.436          | 0.442           |
| 72h       |        |              |                        |                       |                |                 |
| PBS       | miR-NC | anta-miR-744 | ALOX15_IN-anta-miR-744 | ACSL4_IN-anta-miR-744 | GPX4_IN-miR-NC | GPX4_IN-miR-744 |
| 0.651     | 0.648  | 0.492        | 0.537                  | 0.543                 | 0.482          | 0.535           |
| 0.657     | 0.652  | 0.488        | 0.546                  | 0.546                 | 0.476          | 0.537           |
| 0.648     | 0.654  | 0.486        | 0.542                  | 0.536                 | 0.472          | 0.528           |
| 0.643     | 0.642  | 0.495        | 0.536                  | 0.538                 | 0.486          | 0.531           |
| 0.656     | 0.647  | 0.496        | 0.548                  | 0.547                 | 0.483          | 0.533           |
| 0.655     | 0.653  | 0.483        | 0.545                  | 0.542                 | 0.475          | 0.526           |

| Figure7 E |         |              |                        |                       |                |                 |
|-----------|---------|--------------|------------------------|-----------------------|----------------|-----------------|
| IL6       |         |              |                        |                       |                |                 |
| PBS       | miR-NC  | anta-miR-744 | ALOX15_IN-anta-miR-744 | ACSL4_IN-anta-miR-744 | GPX4_IN-miR-NC | GPX4_IN-miR-744 |
| 0.84557   | 1.16635 | 3.855719     | 1.879045               | 1.58447               | 3.97237        | 1.957483301     |
| 1.07923   | 1.09809 | 3.800002     | 2.009728               | 1.719513              | 3.312683       | 1.705269784     |
| 1.09581   | 1.10191 | 3.545527     | 1.896054               | 1.717131              | 3.630077       | 1.73868912      |
| 0.6043    | 0.59063 | 2.031201     | 0.985094               | 0.83586               | 1.966095       | 1.092272885     |
| 0.62518   | 0.5611  | 1.979771     | 0.969514               | 0.804594              | 1.797926       | 0.935191248     |
| 0.64231   | 0.53601 | 1.926969     | 0.910249               | 0.817524              | 1.756049       | 0.987829072     |
| TNFa      |         |              |                        |                       |                |                 |
| PBS       | miR-NC  | anta-miR-744 | ALOX15_IN-anta-miR-744 | ACSL4_IN-anta-miR-744 | GPX4_IN-miR-NC | GPX4_IN-miR-744 |
| 0.73816   | 1.42504 | 2.56152      | 1.689973               | 1.776454              | 3.575141       | 1.73628         |
| 1.35473   | 1.53901 | 2.752991     | 2.121375               | 1.461044              | 2.911979       | 1.892115        |
| 1.88165   | 1.3491  | 2.728296     | 1.979313               | 1.922522              | 2.662903       | 2.016705        |
| 1.04114   | 0.88281 | 1.631463     | 1.246745               | 1.275592              | 3.099782       | 1.205112        |
| 1.00498   | 0.89265 | 1.631463     | 1.133015               | 1.24761               | 2.866254       | 1.063018        |
| 0.9132    | 0.83973 | 2.803055     | 1.86995                | 1.611049              | 3.319578       | 2.323017        |
| 1.09505   | 1.06807 | 3.448574     | 2.050534               | 1.607702              | 3.344986       | 2.443586        |

| miRNA intratracheal administration(Figure 8 A) |        |        |              |
|------------------------------------------------|--------|--------|--------------|
| PBS                                            | miR-NC | MIR744 | anta-miR-744 |
|                                                | 0.81   | 1.04   | 20.64        |
|                                                | 0.95   | 1.16   | 18.70        |
|                                                | 1.08   | 1.08   | 18.75        |
|                                                | 1.06   | 1.10   | 16.62        |
|                                                | 1.05   | 1.10   | 17.09        |
|                                                | 1.08   | 1.12   | 16.83        |

| qPCR for Figure 8H,J |              |
|----------------------|--------------|
| GPX4                 |              |
| miR-NC               | anta-miR-744 |
| 0.91                 | 0.22         |
| 1.10                 | 0.22         |
| 1.12                 | 0.30         |
| 1.15                 | 0.33         |
| 1.51                 | 0.39         |
| 1.55                 | 0.56         |
| 0.85                 | 0.31         |
| ACSL4                |              |
| miR-NC               | anta-miR-744 |
| 1.00                 | 1.11         |
| 1.00                 | 1.19         |
| 1.01                 | 1.16         |
| 1.01                 | 1.22         |
| 1.01                 | 1.24         |
| 1.05                 | 1.20         |
| ALOX15               |              |
| miR-NC               | anta-miR-744 |
| 0.94                 | 1.60         |
| 1.06                 | 1.67         |
| 1.06                 | 2.41         |
| 1.27                 | 2.92         |
| 1.73                 | 2.98         |
| 1.72                 | 2.93         |
| IL6                  |              |
| miR-NC               | anta-miR-744 |
| 1.01                 | 3.61         |
| 0.99                 | 4.32         |
| 1.01                 | 4.08         |
| 0.99                 | 4.10         |
| 1.07                 | 4.30         |
| 1.12                 | 4.40         |
| TNFa                 |              |
| miR-NC               | anta-miR-744 |
| 0.94                 | 1.22         |
| 1.07                 | 1.30         |
| 1.07                 | 1.26         |
| 1.08                 | 1.29         |
| 1.19                 | 1.31         |
| 1.22                 | 1.38         |

| MPO(pg/mL) for Figure 8F |        |              |                        |                       |                |                 |
|--------------------------|--------|--------------|------------------------|-----------------------|----------------|-----------------|
| PBS                      | miR-NC | anta-miR-744 | ALOX15_IN-anta-miR-744 | ACSL4_IN-anta-miR-744 | GPX4_IN-miR-NC | GPX4_IN-miR-744 |
| 64.80                    | 55.92  | 80.02        | 66.70                  | 76.85                 | 110.47         | 89.53           |
| 67.34                    | 60.99  | 87.00        | 73.04                  | 74.95                 | 113.00         | 87.63           |
| 62.26                    | 58.46  | 83.83        | 70.51                  | 77.48                 | 108.56         | 85.09           |
| 54.65                    | 61.63  | 92.07        | 75.58                  | 73.68                 | 100.32         | 80.66           |
| 49.58                    | 65.43  | 87.63        | 74.31                  | 71.78                 | 104.12         | 76.85           |
| 54.02                    | 66.70  | 89.53        | 77.48                  | 74.31                 | 102.22         | 80.02           |

| lung injury scores for Figure 8E |        |              |                       |                        |                |                 |
|----------------------------------|--------|--------------|-----------------------|------------------------|----------------|-----------------|
| PBS                              | miR-NC | anta-miR-744 | ACSL4_IN-anta-miR-744 | ALOX15_IN-anta-miR-744 | GPX4_IN-miR-NC | GPX4_IN-miR-744 |
| 0.28                             | 0.33   | 0.64         | 0.43                  | 0.28                   | 0.73           | 0.51            |
| 0.28                             | 0.33   | 0.67         | 0.45                  | 0.41                   | 0.72           | 0.48            |
| 0.33                             | 0.28   | 0.80         | 0.37                  | 0.39                   | 0.78           | 0.50            |
| 0.28                             | 0.28   | 0.68         | 0.28                  | 0.30                   | 0.73           | 0.38            |
| 0.33                             | 0.38   | 0.70         | 0.38                  | 0.35                   | 0.76           | 0.39            |
| 0.38                             | 0.40   | 0.70         | 0.40                  | 0.36                   | 0.75           | 0.39            |



| Figure 9 B,C |        |      |                  |            |             |
|--------------|--------|------|------------------|------------|-------------|
| IL6          |        |      |                  |            |             |
| PBS          | miR-NC | LPS  | anta-miR-744+LPS | miR-NC+LPS | miR-744+LPS |
| 0.99         | 1.06   | 2.33 | 3.56             | 2.84       | 2.08        |
| 1.01         | 1.07   | 2.52 | 4.03             | 2.80       | 2.01        |
| 1.00         | 1.09   | 2.48 | 4.09             | 2.95       | 2.05        |
| 1.11         | 0.99   | 3.21 | 4.81             | 3.58       | 2.53        |
| 1.09         | 1.05   | 3.06 | 4.94             | 3.30       | 2.20        |
| 0.83         | 1.02   | 2.76 | 4.51             | 3.29       | 2.26        |
| TNFa         |        |      |                  |            |             |
| PBS          | miR-NC | LPS  | anta-miR-744+LPS | miR-NC+LPS | miR-744+LPS |
| 1.04         | 1.11   | 2.10 | 4.65             | 2.28       | 1.35        |
| 1.03         | 1.10   | 2.01 | 4.52             | 2.32       | 1.31        |
| 0.94         | 1.07   | 1.77 | 4.00             | 2.35       | 1.41        |
| 0.93         | 1.04   | 2.16 | 3.63             | 2.23       | 1.90        |
| 1.07         | 1.19   | 2.45 | 5.98             | 2.34       | 1.91        |
| GPX4         |        |      |                  |            |             |
| PBS          | miR-NC | LPS  | anta-miR-744+LPS | miR-NC+LPS | miR-744+LPS |
| 0.97         | 1.14   | 0.56 | 0.38             | 0.64       | 0.94        |
| 1.02         | 1.12   | 0.60 | 0.38             | 0.72       | 0.89        |
| 1.01         | 1.14   | 0.61 | 0.39             | 0.73       | 0.88        |
| 1.01         | 0.99   | 0.64 | 0.39             | 0.61       | 0.72        |
| 1.07         | 1.05   | 0.59 | 0.36             | 0.63       | 0.69        |
| 0.92         | 0.99   | 0.60 | 0.36             | 0.64       | 0.73        |
| ACSL4        |        |      |                  |            |             |
| PBS          | miR-NC | LPS  | anta-miR-744+LPS | miR-NC+LPS | miR-744+LPS |
| 0.98         | 1.03   | 2.01 | 3.15             | 2.39       | 1.88        |
| 1.01         | 1.24   | 2.10 | 3.20             | 2.45       | 1.86        |
| 1.01         | 1.27   | 2.24 | 3.22             | 2.60       | 1.79        |
| 1.07         | 1.04   | 3.19 | 4.95             | 3.22       | 2.15        |
| 1.10         | 1.05   | 2.87 | 4.44             | 3.21       | 1.89        |
| 0.85         | 1.06   | 2.65 | 4.01             | 3.49       | 1.92        |
| ALOX15       |        |      |                  |            |             |
| PBS          | miR-NC | LPS  | anta-miR-744+LPS | miR-NC+LPS | miR-744+LPS |
| 0.95         | 1.13   | 2.00 | 2.25             | 2.08       | 1.48        |
| 0.94         | 1.19   | 1.93 | 2.95             | 2.08       | 1.51        |
| 1.04         | 1.18   | 1.83 | 2.98             | 2.07       | 1.71        |
| 1.01         | 1.19   | 1.76 | 2.93             | 2.08       | 1.71        |
| 1.05         | 1.17   | 1.75 | 3.33             | 2.16       | 1.77        |
| 1.02         | 1.17   | 1.78 | 3.37             | 2.21       | 1.74        |

| Figure9 EF |      |            |             | Figure S5 |      |            |             |
|------------|------|------------|-------------|-----------|------|------------|-------------|
| IL6        |      |            |             | IL6       |      |            |             |
| Sham       | LPS  | miR-NC+LPS | miR-744+LPS | Sham      | LPS  | miR-NC+LPS | miR-744+LPS |
| 1.06       | 1.41 | 2.96       | 1.35        | 0.97      | 1.97 | 1.50       | 1.10        |
| 0.94       | 1.78 | 3.03       | 1.26        | 1.03      | 1.82 | 1.55       | 1.23        |
| 0.92       | 1.55 | 1.22       | 1.19        | 0.89      | 2.79 | 2.23       | 1.75        |
| 1.09       | 1.45 | 1.59       | 1.14        | 1.12      | 2.50 | 2.19       | 1.83        |
| 0.95       | 2.51 | 2.70       | 1.42        | 0.61      | 1.52 | 1.90       | 0.96        |
| 1.05       | 2.88 | 2.90       | 1.67        | 0.63      | 1.70 | 1.80       | 0.96        |
| TNFa       |      |            |             | TNFa      |      |            |             |
| Sham       | LPS  | miR-NC+LPS | miR-744+LPS | Sham      | LPS  | miR-NC+LPS | miR-744+LPS |
| 1.06       | 1.41 | 2.96       | 1.35        | 0.99      | 1.40 | 1.55       | 1.06        |
| 0.94       | 1.78 | 3.03       | 1.26        | 1.01      | 1.59 | 1.62       | 1.13        |
| 0.92       | 1.55 | 1.22       | 1.19        | 0.91      | 1.39 | 1.63       | 1.12        |
| 1.09       | 1.45 | 1.59       | 1.14        | 1.10      | 1.41 | 1.75       | 1.28        |
| 0.95       | 2.51 | 2.70       | 1.42        | 0.87      | 1.88 | 1.42       | 0.87        |
| 1.05       | 2.88 | 2.90       | 1.67        | 1.15      | 1.86 | 1.49       | 1.06        |
| GPX4       |      |            |             | GPX4      |      |            |             |
| Sham       | LPS  | miR-NC+LPS | miR-744+LPS | Sham      | LPS  | miR-NC+LPS | miR-744+LPS |
| 1.06       | 0.36 | 0.36       | 0.80        | 0.99      | 0.55 | 0.58       | 0.73        |
| 0.95       | 0.38 | 0.35       | 0.82        | 1.02      | 0.65 | 0.62       | 0.76        |
| 0.99       | 0.44 | 0.35       | 0.64        | 1.00      | 0.36 | 0.40       | 0.67        |
| 1.01       | 0.45 | 0.40       | 0.63        | 1.00      | 0.35 | 0.41       | 0.68        |
| 0.99       | 0.37 | 0.35       | 0.41        | 1.01      | 0.52 | 0.36       | 0.63        |
| 1.01       | 0.39 | 0.36       | 0.56        | 0.99      | 0.45 | 0.36       | 0.66        |
| ACSL4      |      |            |             | ACSL4     |      |            |             |
| Sham       | LPS  | miR-NC+LPS | miR-744+LPS | Sham      | LPS  | miR-NC+LPS | miR-744+LPS |
| 1.00       | 2.37 | 2.92       | 1.36        | 0.93      | 2.64 | 2.58       | 1.39        |
| 1.00       | 2.81 | 3.07       | 1.33        | 1.08      | 2.83 | 2.72       | 1.55        |
| 1.07       | 2.18 | 1.77       | 1.39        | 0.93      | 2.17 | 1.83       | 1.02        |
| 0.93       | 2.29 | 1.95       | 1.39        | 1.08      | 2.09 | 1.67       | 1.14        |
| 1.00       | 2.16 | 2.07       | 0.81        | 0.94      | 1.91 | 1.97       | 0.99        |
| 1.00       | 2.32 | 2.15       | 1.07        | 1.07      | 1.99 | 2.15       | 1.04        |
| ALOX15     |      |            |             | ALOX15    |      |            |             |
| Sham       | LPS  | miR-NC+LPS | miR-744+LPS | Sham      | LPS  | miR-NC+LPS | miR-744+LPS |
| 0.97       | 1.61 | 1.80       | 1.06        | 0.93      | 1.82 | 1.93       | 1.16        |
| 1.03       | 1.78 | 2.05       | 1.22        | 1.07      | 1.89 | 1.99       | 1.21        |
| 0.93       | 1.64 | 1.68       | 0.78        | 1.01      | 1.45 | 1.45       | 0.82        |
| 1.07       | 1.71 | 1.77       | 0.99        | 0.99      | 1.60 | 1.40       | 0.99        |
| 0.95       | 1.38 | 1.41       | 1.29        | 0.89      | 1.84 | 1.93       | 1.18        |
| 1.05       | 1.52 | 1.57       | 1.32        | 1.12      | 1.98 | 2.04       | 1.63        |

| <b>Figure10A</b> |            |
|------------------|------------|
| PBS              | LPS        |
| 0.95247293       | 0.57784321 |
| 1.03580326       | 0.54064369 |
| 1.00538635       | 0.53952062 |
| 1.00817774       | 0.5413937  |
| 0.99705846       | 0.54327328 |
| 0.93740864       | 0.54176909 |
| 0.93416545       | 0.54064369 |
| 0.96309499       | 0.4988749  |
| 0.99427627       | 0.37600498 |
| 1.00575667       | 0.37950469 |
| 0.9091521        | 0.3524649  |
| 1.05304009       | 0.36377194 |

| <b>Figure 10B</b> |         |         |         |
|-------------------|---------|---------|---------|
| blood             |         | Exosome |         |
| PBS               | ARDS    | PBS     | ARDS    |
| 1.0895            | 0.03963 | 1.01256 | 0.57995 |
| 0.91362           | 0.03752 | 0.97603 | 0.56448 |
| 1.00463           | 0.03621 | 1.01185 | 0.53849 |
| 1.30285           | 0.16977 | 1.10343 | 0.40304 |
| 1.28669           | 0.27694 | 1.01256 | 0.41123 |
| 1.16044           | 0.28003 | 1.03455 | 0.52522 |
| 2.27469           | 0.04277 | 1.2861  | 0.55402 |
| 2.27469           | 0.04782 | 1.30496 | 0.52123 |
| 2.11795           | 0.04716 | 1.26313 | 0.51548 |
| 1.09              | 0.11561 | 1.44193 | 0.52888 |
| 0.9555            | 0.11245 | 1.37745 | 0.537   |
| 0.96015           | 0.11098 | 1.14235 | 0.44566 |
| 0.29696           | 0.10506 | 2.20381 | 0.63994 |
| 0.30446           | 0.1072  | 2.27363 | 0.63949 |
| 0.30006           | 0.10085 | 2.30537 | 0.65429 |
| 2.09701           | 0.02525 | 2.35381 | 0.72951 |
| 2.28998           | 0.02389 | 2.21453 | 0.7495  |
| 2.3075            | 0.02307 | 2.17799 | 0.68492 |

| <b>FigS3.B,CD</b> |       |        |           |
|-------------------|-------|--------|-----------|
| GPX4              |       |        |           |
| WT                | MC-/- | LPS+WT | LPS+MC-/- |
| 0.92              | 1.04  | 0.24   | 0.54      |
| 1.08              | 1.05  | 0.28   | 0.61      |
| 0.98              | 0.93  | 0.31   | 0.55      |
| 1.00              | 0.99  | 0.39   | 0.58      |
| 0.93              | 1.19  | 0.41   | 0.65      |
| 1.08              | 1.08  | 0.40   | 0.69      |
| ACSL4             |       |        |           |
| WT                | MC-/- | LPS+WT | LPS+MC-/- |
| 0.91              | 0.87  | 4.05   | 2.13      |
| 1.10              | 0.95  | 5.08   | 2.66      |
| 1.03              | 0.87  | 5.35   | 2.97      |
| 1.31              | 0.97  | 5.38   | 3.46      |
| 1.01              | 1.10  | 8.42   | 5.11      |
| 0.99              | 1.13  | 9.74   | 3.76      |
| ALOX15            |       |        |           |
| WT                | MC-/- | LPS+WT | LPS+MC-/- |
| 0.98              | 1.06  | 5.53   | 3.31      |
| 1.02              | 1.05  | 5.68   | 3.51      |
| 1.00              | 0.94  | 5.56   | 3.39      |
| 1.03              | 0.96  | 5.65   | 3.28      |
| 1.02              | 1.39  | 4.06   | 1.96      |
| 0.98              | 1.50  | 5.54   | 1.66      |
| IL6               |       |        |           |
| WT                | MC-/- | LPS+WT | LPS+MC-/- |
| 0.99              | 0.95  | 4.87   | 3.15      |
| 1.01              | 1.01  | 5.19   | 3.15      |
| 0.99              | 0.89  | 5.21   | 2.77      |
| 0.96              | 0.92  | 5.04   | 2.86      |
| 1.01              | 0.88  | 3.84   | 1.95      |
| 0.99              | 0.90  | 4.47   | 1.51      |
| TNFa              |       |        |           |
| WT                | MC-/- | LPS+WT | LPS+MC-/- |
| 1.06              | 0.87  | 2.99   | 1.82      |
| 0.95              | 0.80  | 2.93   | 1.94      |
| 0.97              | 0.82  | 3.25   | 2.06      |
| 0.87              | 0.82  | 3.26   | 1.66      |
| 0.98              | 1.29  | 4.61   | 2.17      |
| 1.02              | 1.16  | 4.09   | 2.32      |
| miR-744           |       |        |           |
| WT                | MC-/- | LPS+WT | LPS+MC-/- |
| 1.03              | 0.73  | 0.12   | 0.56      |
| 0.97              | 0.81  | 0.13   | 0.60      |
| 0.91              | 0.89  | 0.17   | 0.59      |
| 0.96              | 0.89  | 0.21   | 0.61      |
| 0.92              | 0.80  | 0.07   | 0.42      |
| 1.20              | 0.73  | 0.07   | 0.43      |

| <b>FigS3.E,F,G</b> |        |        |           |
|--------------------|--------|--------|-----------|
| GPX4(ng/mL)        |        |        |           |
| WT                 | MC-/-  | LPS+WT | LPS+MC-/- |
| 11.74              | 10.97  | 4.44   | 7.02      |
| 16.31              | 10.62  | 4.85   | 7.13      |
| 12.19              | 12.11  | 1.89   | 4.37      |
| 14.40              | 11.27  | 1.61   | 4.51      |
| 15.31              | 13.65  | 4.50   | 6.00      |
| 16.67              | 13.83  | 4.92   | 5.92      |
| ACSL4(ng/mL)       |        |        |           |
| WT                 | MC-/-  | LPS+WT | LPS+MC-/- |
| 4.50               | 13.00  | 56.68  | 25.51     |
| 4.62               | 10.17  | 46.50  | 26.58     |
| 9.35               | 5.57   | 43.77  | 31.10     |
| 8.65               | 6.60   | 42.17  | 34.76     |
| 3.51               | 9.68   | 49.53  | 30.09     |
| 3.88               | 7.50   | 48.95  | 29.09     |
| ALOX15(ng/mL)      |        |        |           |
| WT                 | MC-/-  | LPS+WT | LPS+MC-/- |
| 0.83               | 0.91   | 4.44   | 2.46      |
| 0.69               | 1.33   | 3.69   | 2.65      |
| 0.97               | 0.71   | 3.83   | 2.52      |
| 0.86               | 0.62   | 3.71   | 2.75      |
| 0.86               | 0.90   | 3.42   | 2.30      |
| 0.90               | 1.10   | 3.52   | 2.91      |
| IL6(pg/mL)         |        |        |           |
| WT                 | MC-/-  | LPS+WT | LPS+MC-/- |
| 8.71               | 9.92   | 15.37  | 12.15     |
| 8.87               | 10.58  | 15.52  | 13.40     |
| 8.97               | 10.45  | 15.90  | 13.55     |
| 9.99               | 9.76   | 15.15  | 13.10     |
| 8.12               | 9.99   | 15.68  | 11.83     |
| 8.82               | 9.89   | 15.28  | 12.87     |
| TNFa(pg/mL)        |        |        |           |
| WT                 | MC-/-  | LPS+WT | LPS+MC-/- |
| 36.49              | 39.62  | 60.33  | 51.15     |
| 32.05              | 40.39  | 62.53  | 46.01     |
| 33.48              | 34.62  | 66.58  | 47.48     |
| 29.22              | 35.87  | 61.43  | 48.58     |
| 34.99              | 41.56  | 70.62  | 53.79     |
| 38.81              | 36.09  | 68.78  | 56.77     |
| MPO(pg/mL)         |        |        |           |
| WT                 | MC-/-  | LPS+WT | LPS+MC-/- |
| 256.38             | 256.38 | 397.63 | 344.66    |
| 249.76             | 273.38 | 397.63 | 339.15    |
| 276.24             | 278.89 | 375.56 | 324.80    |
| 306.26             | 273.60 | 383.29 | 322.59    |
| 256.38             | 272.71 | 366.73 | 343.56    |
| 219.96             | 266.75 | 367.84 | 331.31    |

| qPCR for Figure S4 A,B |        |              |                        |                       |                |                 |
|------------------------|--------|--------------|------------------------|-----------------------|----------------|-----------------|
| GPX4                   |        |              |                        |                       |                |                 |
| PBS                    | miR-NC | anta-miR-744 | ALOX15_IN-anta-miR-744 | ACSL4_IN-anta-miR-744 | GPX4_IN-miR-NC | GPX4_IN-miR-744 |
| 1.01                   | 0.95   | 0.50         | 0.80                   | 0.75                  | 0.51           | 0.87            |
| 0.94                   | 0.94   | 0.53         | 0.81                   | 0.73                  | 0.51           | 0.84            |
| 1.06                   | 1.03   | 0.53         | 0.96                   | 0.84                  | 0.62           | 0.80            |
| 1.07                   | 1.10   | 0.46         | 0.97                   | 0.76                  | 0.61           | 0.66            |
| 0.93                   | 1.17   | 0.47         | 0.92                   | 0.77                  | 0.65           | 0.86            |
| 0.99                   | 0.93   | 0.26         | 0.66                   | 0.69                  | 0.43           | 0.88            |
| 1.01                   | 0.85   | 0.31         | 0.74                   | 0.80                  | 0.62           | 0.87            |
| ACSL4                  |        |              |                        |                       |                |                 |
| PBS                    | miR-NC | anta-miR-744 | ALOX15_IN-anta-miR-744 | ACSL4_IN-anta-miR-744 | GPX4_IN-miR-NC | GPX4_IN-miR-744 |
| 1.02                   | 0.69   | 2.84         | 1.66                   | 1.39                  | 2.23           | 0.53            |
| 0.96                   | 0.77   | 2.94         | 1.48                   | 1.38                  | 1.98           | 0.53            |
| 1.02                   | 0.86   | 3.00         | 1.64                   | 1.44                  | 1.91           | 0.59            |
| 1.05                   | 0.83   | 2.56         | 1.30                   | 1.21                  | 1.36           | 1.29            |
| 0.96                   | 0.90   | 2.58         | 1.28                   | 1.27                  | 1.80           | 1.44            |
| 0.98                   | 0.90   | 2.41         | 1.36                   | 1.38                  | 1.77           | 1.38            |
|                        |        |              |                        |                       |                |                 |
| ALOX15                 |        |              |                        |                       |                |                 |
| PBS                    | miR-NC | anta-miR-744 | ALOX15_IN-anta-miR-744 | ACSL4_IN-anta-miR-744 | GPX4_IN-miR-NC | GPX4_IN-miR-744 |
| 0.92                   | 0.78   | 1.23         | 0.66                   | 0.96                  | 2.01           | 1.12            |
| 0.91                   | 0.94   | 1.76         | 1.04                   | 0.94                  | 2.04           | 1.16            |
| 1.20                   | 1.00   | 1.99         | 1.17                   | 1.36                  | 2.19           | 1.26            |
| 1.02                   | 0.80   | 2.71         | 1.29                   | 1.54                  | 3.08           | 1.50            |
| 0.98                   | 0.73   | 2.66         | 1.46                   | 1.41                  | 3.03           | 1.58            |
| IL6                    |        |              |                        |                       |                |                 |
| PBS                    | miR-NC | anta-miR-744 | ALOX15_IN-anta-miR-744 | ACSL4_IN-anta-miR-744 | GPX4_IN-miR-NC | GPX4_IN-miR-744 |
| 0.38                   | 0.47   | 0.88         | 0.79                   | 0.64                  | 0.96           | 0.52            |
| 0.39                   | 0.45   | 1.00         | 0.82                   | 0.68                  | 0.94           | 0.52            |
| 0.38                   | 0.46   | 1.11         | 0.82                   | 0.69                  | 0.95           | 0.53            |
| 0.64                   | 0.70   | 1.00         | 0.64                   | 0.81                  | 1.05           | 0.70            |
| 0.61                   | 0.70   | 0.98         | 0.64                   | 0.84                  | 1.02           | 0.69            |
| 0.59                   | 0.71   | 1.02         | 0.62                   | 0.91                  | 1.03           | 0.67            |
| TNFa                   |        |              |                        |                       |                |                 |
| PBS                    | miR-NC | anta-miR-744 | ALOX15_IN-anta-miR-744 | ACSL4_IN-anta-miR-744 | GPX4_IN-miR-NC | GPX4_IN-miR-744 |
| 0.64                   | 0.70   | 1.00         | 0.64                   | 0.81                  | 1.05           | 0.70            |
| 0.61                   | 0.70   | 0.98         | 0.64                   | 0.84                  | 1.02           | 0.69            |
| 0.59                   | 0.71   | 1.02         | 0.62                   | 0.91                  | 1.03           | 0.67            |
| 0.31                   | 0.21   | 0.87         | 0.64                   | 0.46                  | 0.82           | 0.48            |
| 0.38                   | 0.31   | 0.95         | 0.65                   | 0.69                  | 0.81           | 0.48            |
| 0.37                   | 0.31   | 1.18         | 0.69                   | 0.75                  | 0.89           | 0.53            |
